# Supplementary material for: Multilocus Inherited Neoplasia Alleles Syndrome: A Retrospective Review from a Canadian Single Institution
Source: Research Square preprint supplement (doi:10.21203/rs.3.rs-8149436/v1), 2025-12-04
Supplement: Supplementary file 1 [file 2da5dab08ab8e91a94d5ba67.docx]

**Supplemental**

Supplemental Table 1: Risk category assigned to CSGs.

| **Risk Category** | **Genes in MINAS (AD-AD) cases** |
| --- | --- |
| HR | *APC, BRCA1, BRCA2, PALB2, PTEN, RET, SDHB, TP53, CDKN2A, MSH2, SEC23B, PMS2* |
| MR | *ATM, BRIP1, CHEK2, LZTR1, MITF, RAD51C, FH, NF1, POT1, RAD51D, TSC1* |
| LR | *DDX41, DIS3L2, HOXB13* |

Supplemental Table 2: Inheritance mode assigned to CSGs.

| **Mode of inheritance** | **Genes in AD-AR cases** |
| --- | --- |
| AD | *BRCA1, CHEK2, DICER1, PALB2, RAD51C* |
| AR | *FANCC, FANCM, MUTYH, NTHL1* |

Supplemental Table 3: MINAS AD-AD and AD-AR carriers included in this study.

| **Study.ID** | **FamilyID.x.x** | **Cancer_N** | **Sex** | **Combo_Type** | **All_Genes_Info** | **Family History** | **Clinical History** |
| --- | --- | --- | --- | --- | --- | --- | --- |
| M-0004 | Fam_06 | 1 | Female | AD-AD (true-MINAS) | PTEN | Pathogenic | AD; CHEK2 | Likely Pathogenic | AD; TSC1 | Pathogenic | AD | FDRs: negative | SDRs: negative | Renal, Clear cell renal carcinoma, 45 |
| M-0005 | Fam_07 | 0 | Male | AD-AD (true-MINAS) | LZTR1 | Pathogenic | AD; BRCA2 | Pathogenic | AD; | FDRs: cervical (41) | SDRs: prostate (55) |  |
| M-0006 | Fam_08 | 1 | Male | AD-AD (true-MINAS) | BRCA1 | Pathogenic | AD; CHEK2 | Pathogenic | AD; PMS2 | Likely Pathogenic | AD | FDRs: breast (50) | SDRs: negative | Prostate, Prostate adenocarcinoma, 72 |
| M-0007 | Fam_09 | 2 | Female | AD-AD (true-MINAS) | BRCA1 | Pathogenic | AD; TP53 | Likely Pathogenic | AD; | FDRs: osteosarcoma (13), hematologic (65) | SDRs: negative | Breast, Invasive ductal carcinoma, 33 | Breast, NA, 33 |
| M-0009 | Fam_11 | 3 | Female | AD-AD (true-MINAS) | RAD51C | Pathogenic | AD; CDKN2A | Pathogenic | AD; | FDRs: ovarian (55), prostate (72) | SDRs: rectal (38), ovary (80), prostate (50), | Melanoma, NA, 16 | Breast, Invasive ductal carcinoma, 55 | Breast, Invasive ductal/lobular carcinoma, 56 |
| M-0010 | Fam_12 | 1 | Female | AD-AD (true-MINAS) | BRCA1 | Pathogenic | AD; PALB2 | Pathogenic | AD; | FDRs: breast (41), breast (63), prostate (66) | SDRs: breast (22), lung (83) | Ovarian, High grade serous carcinoma, 53 |
| M-0011 | Fam_13 | 2 | Female | AD-AD (true-MINAS) | BRCA1 | Pathogenic | AD; BRCA2 | Pathogenic | AD; | FDRs: breast (60s), ovary (49) | SDRs: breast (51), ovary (75), gallbladder (50s), lung (60s) | Breast, Invasive ductal carcinoma, 28 | Ovarian, Poorly differentiated adenocarcinoma, 33 |
| M-0013 | Fam_15 | 1 | Female | AD-AD (true-MINAS) | BRCA1 | Pathogenic | AD; BRCA2 | Pathogenic | AD; | FDRs: ovary (61), | SDRs: breast (43), breast (40), cervical (28), bladder (83), colorectal (68), hematologic (45), lung (70s), uterine (90s) | Breast, Invasive ductal carcinoma, 35 |
| M-0014 | Fam_16 | 1 | Female | AD-AD (true-MINAS) | BRCA2 | Pathogenic | AD; PALB2 | Pathogenic | AD; | FDRs: breast (69) | SDRs: prostate (77), prostate (70) | Breast, Invasive ductal carcinoma, 28 |
| M-0015 | Fam_17 | 1 | Female | AD-AD (true-MINAS) | BRCA1 | Pathogenic | AD; BRCA2 | Likely Pathogenic | AD; | FDRs: bladder (61) | SDRs: PSU (83) | Breast, Invasive ductal carcinoma, 39 |
| M-0017 | Fam_18 | 1 | Male | AD-AD (true-MINAS) | BRCA2 | Pathogenic | AD; CHEK2 | Pathogenic | AD; | FDRs: breast (42) | SDRs: breast (60), glioblastoma (60s), PSU (70s) | Sarcoma, NA, 26 |
| M-0018 | Fam_01 | 1 | Female | AD-AD (true-MINAS) | BRCA1 | Pathogenic | AD; MSH2 | Pathogenic | AD; | FDRs: breast (40s), ovarian (67) | SDRs: stomach (50s), CRC (60s) | Endometrial, Endometrioid adenocarcinoma, 39 |
| M-0019 | Fam_01 | 0 | Female | AD-AD (true-MINAS) | BRCA1 | Pathogenic | AD; MSH2 | Pathogenic | AD; | FDRs: endometrial (39), ovarian (67), breast (40s) | SDRs: stomach (50s), CRC (60s) | |
| M-0020 | Fam_19 | 0 | Female | AD-AD (true-MINAS) | CHEK2 | Pathogenic | AD; APC | Risk Allele | AD; | FDRs: BCC (40s), BCC (50s) | SDRs: brain (70), breast (50), breast (71) | |
| M-0022 | Fam_21 | 3 | Female | AD-AD (true-MINAS) | MITF | Pathogenic | AD; DIS3L2 | Pathogenic | AD; | FDRs: lung (69), bladder (55) | SDRs: colon (52), colon (70s) | Breast, Invasive ductal carcinoma, 61 | Renal, Wilms tumour, 4 | Small Bowel, Leiomyosarcoma, 55 |
| M-0024 | Fam_22 | 0 | Male | AD-AD (true-MINAS) | CHEK2 | Pathogenic | AD; APC | Risk Allele | AD; | FDRs: breast (30), hematologic (83), renal (87) | SDRs: colon (82), colon (83), lung (52) | |
| M-0025 | Fam_23 | 0 | Female | AD-AD (true-MINAS) | BRCA2 | Pathogenic | AD; CHEK2 | Likely Pathogenic | AD; | FDRs: ovary (63) | SDRs: breast (42), ovary (60) |  |
| M-0055 | Fam_24 | 2 | Female | AD-AD (true-MINAS) | APC | Risk Allele | AD; MSH2 | Pathogenic | AD; | FDRs: breast (52) | SDRs: negative | Endometrial, Endometrioid adenocarcinoma, 53 | Ovarian, Endometrioid adenocarcinoma, 53 |
| M-0056 | Fam_25 | 1 | Male | AD-AD (true-MINAS) | ATM | Pathogenic | AD; HOXB13 | Pathogenic | AD; | FDRs: prostate (48), brain (52), prostate (54), brain (47) | SDRs: prostate (70s), prostate (65) | Prostate, Prostate adenocarcinoma, 56 |
| M-0057 | Fam_26 | 1 | Male | AD-AD (true-MINAS) | BRCA2 | Pathogenic | AD; RAD51C | Likely Pathogenic | AD; | FDRs: prostate (80), breast (65) | SDRs: breast (50s), endometrial (80s), melanoma (57), prostate (50s) | Prostate, Prostate adenocarcinoma, 63 |
| M-0058 | Fam_27 | 0 | Female | AD-AD (true-MINAS) | BRCA2 | Pathogenic | AD; BRIP1 | Pathogenic | AD; | FDRs: ovarian (51), lung (60) | SDRs: lung (65), lung (68), lung (86), prostate (55), kidney (61) | |
| M-0059 | Fam_28 | 0 | Female | AD-AD (true-MINAS) | ATM | Pathogenic | AD; PALB2 | Pathogenic | AD; | FDRs: breast (46), breast (53), colon (83) | SDRs: renal (78), prostate (93) | |
| M-0062 | Fam_29 | 0 | Female | AD-AD (true-MINAS) | BRCA2 | Pathogenic | AD; NF1 | Pathogenic | AD; | FDRs: ovarian (51) | SDRs: prostate (78) |  |
| M-0063 | Fam_03 | 0 | Male | AD-AD (true-MINAS) | SDHB | Pathogenic | AD; CHEK2 | Pathogenic | AD; | FDRs: renal (59), prostate (57), bladder (62), melanoma (58) | SDRs: paraganglioma (25), breast (40s), lung (70s), lung (70s), renal (60s), PSU (60s) | |
| M-0064 | Fam_03 | 3 | Male | AD-AD (true-MINAS) | SDHB | Pathogenic | AD; CHEK2 | Pathogenic | AD; | FDRs: renal (59) | SDRs: paraganglioma (25), breast (40s), lung (70s), lung (70s), renal (60s), PSU (60s) | Prostate, Prostate adenocarcinoma, 57 | Melanoma, Cutaneous melanoma, 58 | Bladder, High-grade papillary urothelial carcinoma, 62 |
| M-0027 | Fam_31 | 1 | Female | AD-AD (true-MINAS) | ATM | Likely Pathogenic | AD; CHEK2 | Likely Pathogenic | AD; | FDRs: bladder cancer (50), vaginal carcinoma (45),throat cancer ( 50) , colon (68) | SDRs: colon (49), ovarian cancer(40) | Melanoma, Choroidal melanoma, 55 |
| M-0028 | Fam_04 | 1 | Male | AD-AD (true-MINAS) | CHEK2 | Likely Pathogenic | AD; SEC23B | Likely Pathogenic | AD; | FDRs: essential thrombocythemia  (52) | SDRs: essential thrombocythemia (67) , Melanoma (86) | Hematologic Disorders, Essential thrombocythemia, 24 |
| M-0030 | Fam_04 | 1 | Female | AD-AD (true-MINAS) | CHEK2 | Likely Pathogenic | AD; SEC23B | Likely Pathogenic | AD; | FDRs: essential thrombocythemia  (31),essential thrombocythemia (67) , Melanoma (86) | SDRs: breast cancer (64), breast cancer ( 40) | Hematologic Disorders, Essential thrombocythemia, 52 |
| M-0032 | Fam_32 | 1 | Male | AD-AD (true-MINAS) | BRCA2 | Pathogenic | AD; CHEK2 | Likely Pathogenic | AD; | FDRs: negative | SDRs: lung cancer (65), skin (55),lymphoma (82) | Melanoma, Cutaneous melanoma, 62 |
| M-0033 | Fam_03 | 0 | Male | AD-AD (true-MINAS) | SDHB | Pathogenic | AD; CHEK2 | Pathogenic | AD; |  |  |
| M-0034 | Fam_03 | 0 | Male | AD-AD (true-MINAS) | SDHB | Pathogenic | AD; CHEK2 | Pathogenic | AD; | SDRs: paraganglioma (25) |  |
| M-0037 | Fam_33 | 0 | Female | AD-AD (true-MINAS) | CHEK2 | Pathogenic | AD; BRCA2 | Likely Pathogenic | AD; | FDRs: breast cancer (53), ovarian cancer (67), | SDRs: breast cancer (70), bladder (77) | |
| M-0038 | Fam_34 | 1 | Male | AD-AD (true-MINAS) | BRCA1 | Pathogenic | AD; CHEK2 | Pathogenic | AD; | FDRs: breast cancer (48), esophageal carcinoma(89) | SDRs: liver cancer (85) | Renal, Clear cell renal carcinoma, 72 |
| M-0040 | Fam_35 | 1 | Female | AD-AD (true-MINAS) | BRCA2 | Pathogenic | AD; CHEK2 | Likely Pathogenic | AD; | FDRs: ovarian cancer (72),breast cancer (72) | SDRs: ovarian cancer (50), endometrial cancer (65) | Breast, Invasive ductal carcinoma, 61 |
| M-0043 | Fam_37 | 1 | Male | AD-AD (true-MINAS) | TP53 | Pathogenic | AD; ATM | Pathogenic | AD; | FDRs: breast cancer (18) | SDRs: thyroid (30), liver (NA) | Sarcoma, Osteosarcoma, 30 |
| M-0044 | Fam_38 | 1 | Male | AD-AD (true-MINAS) | BRCA1 | Pathogenic | AD; RAD51D | Pathogenic | AD; | FDRs: colon cancer (69) , breast (25) | SDRs: colon cancer (68), breast cancer (50) | Renal, Papillary renal cancer, 56 |
| M-0045 | Fam_39 | 1 | Female | AD-AD (true-MINAS) | CHEK2 | Pathogenic | AD; FH | Likely Pathogenic | AD; | FDRs: Melanoma (60), prostate (60), breast (60), lymphoma(77) | SDRs: Breast (70) | Breast, Ductal carcinoma in situ, 80 |
| M-0049 | Fam_42 | 3 | Male | AD-AD (true-MINAS) | RET | Pathogenic | AD; POT1 | Likely Pathogenic | AD; | FDRs: Melanoma (60) | PGL/PCC, NA, 24 | Thyroid (Medullary), NA, 24 | Renal, Chromophobe, 53 |
| M-0065 | Fam_43 | 0 | Female | AD-AD (true-MINAS) | ATM | Pathogenic | AD; BRIP1 | Pathogenic | AD; | SDRs: Ovarian (61) Endometrial (68) Testicular (67) |  |
| M-0066 | Fam_44 | 1 | Female | AD-AD (true-MINAS) | BRCA2 | Pathogenic | AD; RAD51D | Pathogenic | AD; | SDRs: Endometrial (68) Breast (70) | Breast, Invasive ductal carcinoma, 28 |
| M-0067 | Fam_45 | 0 | Female | AD-AD (true-MINAS) | PALB2 | Pathogenic | AD; LZTR1 | Likely Pathogenic | AD; | FDRs: Breast (40 & 70) | SDRs: Pancreas (60) |  |
| M-0068 | Fam_46 | 2 | Female | AD-AD (true-MINAS) | PALB2 | Pathogenic | AD; CHEK2 | Likely Pathogenic | AD; | FDRs: Breast (34) | SDRs: Breast (42) Breast (82) | Breast, Invasive ductal carcinoma, 51 | Breast, Invasive ductal carcinoma, 51 |
| M-0069 | Fam_47 | 1 | Male | AD-AD (true-MINAS) | CHEK2 | Pathogenic | AD; APC | Risk Allele | AD; |  | Neuroendocrine, NA, 81 |
| M-0071 | Fam_48 | 0 | Male | AD-AD (true-MINAS) | BRCA1 | Pathogenic | AD; APC | Risk Allele | AD; | FDRs: Breast (37) | SDRs: Prostate (55) |  |
| M-0072 | Fam_49 | 1 | Female | AD-AD (true-MINAS) | DDX41 | Likely Pathogenic | AD; ATM | Pathogenic | AD; | SDRs: Breast (36) | Hematologic Disorders, NA, 83 |
| M-0073 | Fam_50 | 1 | Male | AD-AD (true-MINAS) | ATM | Pathogenic | AD; MITF | Pathogenic | AD; | FDRs: Kidney (56) Brain (62) Breast (82) Sarcoma (60) | Melanoma, NA, 55 |
| M-0075 | Fam_52 | 1 | Male | AD-AD (true-MINAS) | BRCA1 | Pathogenic | AD; BRCA2 | Pathogenic | AD; | FDRs: Acute leukemia (2) Prostate (62) | SDRs: Ovarian (42) | Prostate, Prostate adenocarcinoma, 71 |
| M-0076 | Fam_53 | 2 | Female | AD-AD (true-MINAS) | BRCA1 | Pathogenic | AD; BRCA2 | Likely Pathogenic | AD; |  | Thyroid (Papillary), Papillary thyroid carcinoma, 31 | Breast, Invasive ductal/lobular carcinoma, 32 |
| M-0078 | Fam_55 | 0 | Male | AD-AD (true-MINAS) | CHEK2 | Pathogenic | AD; MITF | Pathogenic | AD; | FDRs: Skin (75) | SDRs: Prostate (40) Brain (75) Prostate (70) Colon (70) Bladder (85) | |
| M-0079 | Fam_56 | 2 | Male | AD-AD (true-MINAS) | RAD51C | Pathogenic | AD; CHEK2 | Likely Pathogenic | AD; | FDRs: Liver (60) | Prostate, Prostate adenocarcinoma, 66 | Thyroid (Papillary), Papillary thyroid carcinoma, 72 |
| M-0081 | Fam_57 | 2 | Male | AD-AD (true-MINAS) | BRCA2 | Likely Pathogenic | AD; BRIP1 | Likely Pathogenic | AD; | FDRs: Lung (64) | SDRs: Brain (45) | Prostate, Prostate adenocarcinoma, 59 | Hematologic Disorders, NA, 46 |
| M-0082 | Fam_58 | 2 | Female | AD-AD (true-MINAS) | BRIP1 | Likely Pathogenic | AD; CHEK2 | Likely Pathogenic | AD; | FDRs: PSU (50) [Breast (50)Bladder(65)Liver(65)] | Ovarian, High grade serous carcinoma, 73 | Hematologic Disorders, NA, 66 |
| M-0083 | Fam_59 | 1 | Female | AD-AD (true-MINAS) | CHEK2 | Likely Pathogenic | AD; LZTR1 | Likely Pathogenic | AD; | SDRs: Breast (?) Kidney (?) Stomach (?) | Breast, Invasive ductal carcinoma, 45 |
| M-0084 | Fam_60 | 3 | Female | AD-AD (true-MINAS) | ATM | Pathogenic | AD; CHEK2 | Likely Pathogenic | AD; |  | Adenoid Cystic, NA, 40 | Breast, Invasive lobular carcinoma, 42 | Breast, Invasive lobular carcinoma, 42 |
| M-0002 | Fam_05 | 1 | Female | AD-AR (Other) | PALB2 | Pathogenic | AD; MUTYH | Pathogenic | AR; |  | Breast, Invasive ductal carcinoma, 52 |
| M-0008 | Fam_10 | 1 | Female | AD-AR (Other) | PALB2 | Pathogenic | AD; FANCM | Pathogenic | AR; |  | Breast, Invasive ductal carcinoma, 36 |
| M-0012 | Fam_14 | 1 | Female | AD-AR (Other) | RAD51C | Pathogenic | AD; MUTYH | Pathogenic | AR; |  | Pancreatic, NA, 59 |
| M-0021 | Fam_20 | 2 | Female | AD-AR (Other) | CHEK2 | Pathogenic | AD; FANCC | Pathogenic | AR; |  | Breast, Invasive ductal carcinoma, 35 | Hematologic Disorders, NA, 52 |
| M-0053 | Fam_02 | 1 | Female | AD-AR (Other) | BRCA1 | Pathogenic | AD; FANCC | Pathogenic | AR; |  | Breast, Invasive ductal carcinoma, 55 |
| M-0054 | Fam_02 | 0 | Female | AD-AR (Other) | BRCA1 | Pathogenic | AD; FANCC | Pathogenic | AR; |  |  |
| M-0026 | Fam_30 | 1 | Female | AD-AR (Other) | CHEK2 | Likely Pathogenic | AD; MUTYH | Pathogenic | AR; | FDRs: negative | SDRs: colon cancer ( 71) bladder (70) bladder (60) | Ovarian, NA, 31 |
| M-0042 | Fam_36 | 1 | Female | AD-AR (Other) | CHEK2 | Pathogenic | AD; MUTYH | Pathogenic | AR; | FDRs: negative | SDRs: breast cancer(60), prostate(NA) renal cancer(NA), thyroid (55),lung (NA),Colon(NA) | Neuroendocrine, Pancreatic neuroendocrine tumor, 41 |
| M-0047 | Fam_40 | 0 | Female | AD-AR (Other) | DICER1 | Pathogenic | AD; MUTYH | Pathogenic | AR; | FDRs: Cystic nephroma (1) |  |
| M-0048 | Fam_41 | 1 | Male | AD-AR (Other) | BRCA1 | Pathogenic | AD; MUTYH | Pathogenic | AR; | FDRs: Breast (44), Breast (40) , Colon (73) | SDRs: Breast (42), Breast (36), Colon (48) | Testicular, Embryonal carcinoma, 39 |
| M-0077 | Fam_54 | 0 | Male | AD-AR (Other) | CHEK2 | Pathogenic | AD; NTHL1 | Pathogenic | AR; | FDRs: Appendecial (54) Breast (50) Primary Peritoneal (80) Stomach (88) | SDRs: Breast (42) Breast (40) Stomach (55) Stomach (40) | |

Supplemental Table 4:Atypical cancers in affected MINAS carriers, with the atypical cancer(s) bolded.

| **Study.ID** | **FamilyID.x.x** | **Cancer_N** | **Sex** | **All_Genes_Info** | **Clinical History** |
| --- | --- | --- | --- | --- | --- |
| M-0017 | Fam_18 | 1 | Male | BRCA2 | Pathogenic | AD; CHEK2 | Pathogenic | AD; | **Sarcoma, NA, 26** |
| M-0027 | Fam_31 | 1 | Female | ATM | Likely Pathogenic | AD; CHEK2 | Likely Pathogenic | AD; | **Melanoma, Choroidal melanoma**, **55** |
| M-0028 | Fam_04 | 1 | Male | CHEK2 | Likely Pathogenic | AD; SEC23B | Likely Pathogenic | AD; | **Hematologic Disorders, Essential thrombocythemia, 24** |
| M-0030 | Fam_04 | 1 | Female | CHEK2 | Likely Pathogenic | AD; SEC23B | Likely Pathogenic | AD; | **Hematologic Disorders, Essential thrombocythemia, 52** |
| M-0038 | Fam_34 | 1 | Male | BRCA1 | Pathogenic | AD; CHEK2 | Pathogenic | AD; | **Renal, Clear cell renal carcinoma, 72** |
| M-0044 | Fam_38 | 1 | Male | BRCA1 | Pathogenic | AD; RAD51D | Pathogenic | AD; | **Renal, Papillary renal cancer, 56** |
| M-0069 | Fam_47 | 1 | Male | CHEK2 | Pathogenic | AD; APC | Risk Allele | AD; | **Neuroendocrine, NA, 81** |
| M-0081 | Fam_57 | 2 | Male | BRCA2 | Likely Pathogenic | AD; BRIP1 | Likely Pathogenic | AD; | Prostate, Prostate adenocarcinoma, 59 | **Hematologic Disorders, NA, 46** |
| M-0082 | Fam_58 | 2 | Female | BRIP1 | Likely Pathogenic | AD; CHEK2 | Likely Pathogenic | AD; | Ovarian, High grade serous carcinoma, 73 | **Hematologic Disorders, NA, 66** |
| M-0079 | Fam_56 | 2 | Male | RAD51C | Pathogenic | AD; CHEK2 | Likely Pathogenic | AD; | Prostate, Prostate adenocarcinoma, 66 | **Thyroid (Papillary), Papillary thyroid carcinoma, 72** |
| M-0076 | Fam_53 | 2 | Female | BRCA1 | Pathogenic | AD; BRCA2 | Likely Pathogenic | AD; | **Thyroid (Papillary), Papillary thyroid carcinoma, 31** | Breast, Invasive ductal/lobular carcinoma, 32 |
| M-0064 | Fam_03 | 3 | Male | SDHB | Pathogenic | AD; CHEK2 | Pathogenic | AD; | Prostate, Prostate adenocarcinoma, 57 | **Melanoma, Cutaneous melanoma, 58 | Bladder, High-grade papillary urothelial carcinoma, 62** |
| M-0022 | Fam_21 | 3 | Female | MITF | Pathogenic | AD; DIS3L2 | Pathogenic | AD; | **Breast, Invasive ductal carcinoma, 61 |** Renal, Wilms tumour, 4 | **Small Bowel, Leiomyosarcoma, 55** |
| M-0049 | Fam_42 | 3 | Male | RET | Pathogenic | AD; POT1 | Likely Pathogenic | AD; | PGL/PCC, NA, 24 | Thyroid (Medullary), NA, 24 | **Renal (cell carcinoma), Chromophobe, 53** |
| M-0084 | Fam_60 | 3 | Female | ATM | Pathogenic | AD; CHEK2 | Likely Pathogenic | AD; | **Adenoid Cystic, NA, 40** | Breast, Invasive lobular carcinoma, 42 | Breast, Invasive lobular carcinoma, 42 |
